# Supplementary material for: Interaction of sortilin with apolipoprotein E3 enables neurons to use long-chain fatty acids as alternative metabolic fuel
Source: Springer Nature journal article supplement (doi:10.1038/s42255-025-01389-5), 2025-10-16
Supplement: MOESM3 [file 42255_2025_1389_MOESM3_ESM.xlsx]

## Sheet: Fig S7a
Suppl Fig. S7a
		Delta Rn		Delta Rn
		Allele 1 (APOEε4)		Allele 2 (APOEε3)
	E3WT	0.550969		2.12298
	E3WT	0.470459		2.34938
	E3WT	0.499005		2.22067
	E3KO	0.552395		2.11938
	E3KO	0.52387		2.18321
	E3KO	0.493367		2.31348
	E4WT	1.36404		0.689105
	E4WT	1.36463		0.635417
	E4WT	1.42356		0.580058
	E4KO	1.39455		0.725944
	E4KO	1.31644		0.721499
	E4KO	1.42444		0.556226
	APOEε3/ε3	0.538329		2.10175
	APOEε3/ε3	0.512851		2.13861
	APOEε3/ε3	0.505344		2.21989
	APOEε3/ε4	0.910891		1.53789
	APOEε3/ε4	0.949673		1.67763
	APOEε3/ε4	0.938369		1.72725
	APOEε4/ε4	1.31425		0.58634
	APOEε4/ε4	1.36464		0.630357
	APOEε4/ε4	1.37006		0.651312
	water	0.0535574		0.115161
	water	0.0532976		0.126862
	water	0.0578486		0.130354

## Sheet: Fig S7d
Suppl Fig. S7d
	SOX2										OCT4
	E3WT	E3KO	E4WT	E4KO							E3WT	E3KO	E4WT	E4KO
	0.850704	1.46283	1.11796	0.816132							0.766812	0.730766	0.806603	0.668299
	0.952621	0.889659	1.77619	1.03139							0.954403	0.794594	1.06445	1.28875
	1.14061	0.941725	0.87694	0.821892							1.14102	0.733883	1.1347	0.887131
	1.08184	1.09618	1.12406	1.20723							1.19752	1.81606	0.849849	0.792986
	1.21658	1.08617	0.85382	0.965577							1.11528	0.810176	0.829677	0.930531
	1.2355	1.02269	0.765091								1.07433	0.906873	0.80526
	0.665297	0.809025									0.834601	0.889504
