# Supplementary material for: Interaction of sortilin with apolipoprotein E3 enables neurons to use long-chain fatty acids as alternative metabolic fuel
Source: Springer Nature journal article supplement (doi:10.1038/s42255-025-01389-5), 2025-10-16
Supplement: MOESM4 [file 42255_2025_1389_MOESM4_ESM.xlsx]

## Sheet: Figure 1
Figure 1c-f
Basal Respiration
	E3WT	E3KO	E4WT	E4KO
	100	108	106	70
	100	77	88	77
	100	80	64	83
	100	101	126	97
	100	97	102	88
	100	94	85	88
Proton leak
	E3WT	E3KO	E4WT	E4KO
	100	211	211	429
	100	95	122	126
	100	89	104	87
	100	76	96	60
	100	76	70	86
	100	107	102	99
ATP-linked Respiration
	E3WT	E3KO	E4WT	E4KO
	100	91	97	71
	100	91	94	73
	100	130	78	28
	100	80	75	103
	100	85	56	79
	100	114	169	92
Maximal Respiration
	E3WT	E3KO	E4WT	E4KO
	100	74	65	69
	100	74	68	71
	100	67	64	81
	100	66	74	69
	100	70	66	70
	100	76	72	74
Figure 1g-j
E3WT						E3KO						E4WT						E4KO
	Control	Etomoxir	UK5099				Control	Etomoxir	UK5099				Control	Etomoxir	UK5099				Control	Etomoxir	UK5099
	100	81	69				100	122	70				100	81	55				100	139	85
	100	69	46				100	128	68				100	118	85				100	176	80
	100	84	62				100	103	74				100	113	81				100	99	86
