# Supplementary material for: Interaction of sortilin with apolipoprotein E3 enables neurons to use long-chain fatty acids as alternative metabolic fuel
Source: Springer Nature journal article supplement (doi:10.1038/s42255-025-01389-5), 2025-10-16
Supplement: MOESM5 [file 42255_2025_1389_MOESM5_ESM.xlsx]

## Sheet: Fig2
Figure 2b-e
E3WT					E3KO					E4WT					E4KO
	Control	Palmitate				Control	Palmitate				Control	Palmitate				Control	Palmitate
	100	147				100	102				100	102				100	92
	100	148				100	88				100	81				100	116
	100	149				100	107				100	115				100	120
Figure 2f-i
E3WT					E3KO					E4WT					E4KO
	Control	Acetic acid	Butyric acid			Control	Acetic acid	Butyric acid			Control	Acetic acid	Butyric acid			Control	Acetic acid	Butyric acid
	100	91	98			100	116	129			100	133	145			100	117	132
	100	106	105			100	105	133			100	148	142			100	134	152
	100	121	116			100	111	134			100	126	132			100	118	134
Figure 2j-m
E3WT					E3KO					E4WT					E4KO
	Control	Heptanoic acid	Octanoic acid			Control	Heptanoic acid	Octanoic acid			Control	Heptanoic acid	Octanoic acid			Control	Heptanoic acid	Octanoic acid
	100	109	110			100	139	122			100	121	125			100	124	117
	100	112	102			100	111	117			100	110	121			100	109	125
	100	116	111			100	132	125			100	109	115			100	129	117
