# Supplementary material for: Interaction of sortilin with apolipoprotein E3 enables neurons to use long-chain fatty acids as alternative metabolic fuel
Source: Springer Nature journal article supplement (doi:10.1038/s42255-025-01389-5), 2025-10-16
Supplement: MOESM6 [file 42255_2025_1389_MOESM6_ESM.xlsx]

## Sheet: Fig3a
Fig.3a
Neun - astrocytes																						Neun - neurons
	WT								KO														WT								KO
E3	0.041268	0.0753288	0.11943	0.330465	0.0215976	0.0507402	0.1951	0.0886009	0.192887	0.0660657	0.103091	0.287622	0.00262232									E3	1.08249	0.77603	1.15041	0.848119	1.11884	0.874713	1.26987	0.981743	0.636702	0.814579	1.1251	0.706941	0.671067
E4	0.0529599	0.0539837	0.0378149	0.00065247	0.0490281	0.0109272	0.0113076		0.0195595	0.057396	0.0372341	0.0532961	0.00229038	38015000000	74836000000							E4	0.212216	0.464067	0.492035	0.942244	0.799972	0.814542	0.919278		1.2024	0.973477	0.625446	0.457486	0.487481	0.308476	1.19227
Baf53b - astrocytes																						Baf53b - neurons
	WT								KO														WT								KO
E3	0.000854081	0.00274227	0.126079	0.00776312	0.150057	0.00518848	0.0418416	0.0037019	0.00660228	0.0599854	0.00806256	0.00380785	0.00790654									E3	0.949748	1.00137	1.22302	1.43414	1.10537	0.662108	1.80989	0.452566	0.959771	1.30858	1.78778	0.916108	1.00756
E4	0.00211133	0.00172738	0.0440122	0.00196727	0.00278263	0.0329464	0.010144		0.0180196	0.0343781	0.0244642	0.00117815	0.031886	0.112531	0,60492583*							E4	1.01915	0.743104	1.53554	1.02313	1.47879	0.468276	1.25618		0.993693	1.49509	1.31093	1.07103	0.655867	0.477719	0.980882

## Sheet: Fig3b
Fig.3b
Aldh1l1 - astrocytes																						Aldh1l1 - neurons
	WT								KO														WT								KO
E3	0.658893	1.0816	1.40474	1.02569	0.890467	1.30648	0.913577	0.916308	0.929244	0.864363	0.928608	1.17945	0.759824									E3	0.0764628	0.0454686	0.060037	0.0693644	0.201623	0.125478	0.0349076	0.0386902	0.0455032	0.0416649	0.0701941	0.102808	0.0228946
E4	0.973972	1.06226	1.0148	0.853448	0.561648	0.623667	0.776223		0.84351	1.0107	0.943259	0.678882	0.451447	0.672345	0.787403							E4	0.0501278	0.0567688	0.0160607	0.0210838	0.0414701	0.053862	0.0595867		0,6469445*	0.0330907	0.0258438	0.0235935	0.0341108	0.0420092	0.0690348
Gfap - astrocytes																						Gfap - neurons
	WT								KO														WT								KO
E3	0.589245	0.996214	1.10522	0.73541	0.877444	1.30382	1.73486	1.05602	0.738803	1.21013	1.11792	0.649326	0.925075									E3	0.0732165	0.00058096	0.477108	0.297852	0.00105534	0.190062	0.0799263	0.168042	0.0707816	0.132912	0,57026181*	0.0538343	0.0837886
E4	1.43113	0.98073	1.19402	0.874395	0.628369	1.02712	0.739613		0.997907	1.10213	0.84856	0.744826	0.884907	1.18945	0.945887							E4	0.0559301	0.118052	0.154214	0.214029	0.175819	0.11237	0.349015		0.54119	0.190131	0.0903084	0.0715062	0.0897203	0.108302	15391000000

## Sheet: Fig3c
Fig. 3c
Acadl - astrocytes																						Acadl - neurons
	WT								KO														WT								KO
E3	1.64993	0.758494	1.05119	0.37482	1.7241	1.76777	0.79863	0.833192	1.06214	1.56535	0.810745	0.402798	0.793951									E3	1.02754	2.35238	0.329484	1.15102	0.990185	1.28131	0.992822	0.866031	0.557902	0.516449	0.619369	0.389839	0.364818
E4	1.84103	1.47154	1.42422	1.18667	1.35837	1.11114	1.77706		1.94649	1.98751	1.85768	1.65206	1.63841	0.851328	1.11633							E4	1.22269	0.976296	0.811162	0.650782	0.604501	0.652532	0.483876		1.58109	1.42915	0.894134	1.36546	0.514047	1.07151	0.574883
Cpt2 - astrocytes																						Cpt2 - neurons
	WT								KO														WT								KO
E3	1.82075	1.10148	0.88381	1.04392	2.01911	0.215839	1.19738	1.03567	0.135352	1.26172	0.463025	1.93361	3.10707									E3	0.810509	1.77016		0.16602	1.80171	3.01121	0.816806	0.947385	0.584967	1.59425	1.86727	1.09493	0.378807
E4	1.26978	2.73554	3.46634	2.05906	3.87338	7.15217	1.95391		2.06035	1.35022	2.09781	1.71136	1.79347	1.3122	0.899416							E4	1.29877	2.15823	1.29096	0.721689	0.792664	1.53248	1.46035		4.03716	2.50269	0.814617	0.966015	0.306432	1.51419
Acadvl - astrocytes																						Acadvl - neurons
	WT								KO														WT								KO
E3	0.86673	0.954588	1.24108	1.01309	0.820584	1.40215	1.21267	0.688957	0.795142	0.940835	0.948196	0.695616	0.707501									E3	1.39027	1.39797	0.860725	0.663829	0.697014	1.6673	1.20071	0.645341	1.05071	0.809433	0.90086	0.633801	0.914151
E4	1.44953	1.56407	1.24433	1.04815	0.63988	0.778084	0.956717		1.23713	1.03328	1.22108	0.827665	0.933724	1.06193	1.41432							E4	1.70347	0.581159	1.36382	1.17585	1.14786	1.20746	0.924983		2.68725	2.00756	1.13033	1.21252	0.586378	1.01056	0.454734
Acadm - astrocytes																						Acadm - neurons
	WT								KO														WT								KO
E3	1.17004	1.22405	0.778737	1.22415	1.13331	0.587851	1.14828	0.957438	0.840411	0.771018	1.09397	0.919163	0.774236									E3	0.650862	1.55211	0.94568	1.06864	1.03701	0.96389	0.940477	1.04197	0.750205	0.936008	0.640122	1.22913	0.596987
E4	1.41232	1.33634	0.963784	0.899853	0.87344	1.2191	1.25821		1.10413	0.999706	0.939902	1.03758	1.25351	1.17348	0.848885							E4	1.04845	0.94142	0.799907	0.884756	0.814138	0.410987	0.990019		1.08629	0.974791	0.879325	0.640731	0.552018	0.531988	0.336924
Crat - astrocytes																						Crat - neurons
	WT								KO														WT								KO
E3	1.05361	0.8959	1.04485	1.04325	0.986151	0.746084	1.30127	1.01514	0.666853	1.11981	1.1325	1.10459	0.774747									E3	0.654173	1.36119	0.611691	2.01147	0.728661	1.46087	1.42437	0.601979	0.342699	0.445439	0.219131	0.311989	0.285889
E4	1.02934	1.23483	1.21692	0.887493	1.1915	2484,28767*	1.69787		0.951691	0.850271	1.07414	0.959722	1.1055	1.1419	1.06133							E4	0.382631	0.778356	0.542088	0.816754	0.241434	0.224856	0.172735		0.386243	0.653896	0.32957	0.339094	0.198164	0.144869	0.257426
Cpt1a - astrocytes																						Cpt1a - neurons
	WT								KO														WT								KO
E3	0.920801	0.945311	1.14958	0.934098	0.884748	1.23583	1.37901	0.709547	0.909197	0.819289	0.956614	0.939112	0.880484									E3	0.758947	1.33391	0.969121	0.702231	1.92039	1.52697	0.850028	0.582308	0.504149	0.460386	0.39871	0.156725	0.128627
E4	1.00095	1.32485	1.65342	1.08003	0.497103	0.91925	0.955809		1.28935	1.20315	1.23025	1.24947	0.683046	1.25714	0.970669							E4	0.669666	0.791736	0.643131	0.473228	0.413984	0.373978	0.409894		1.42811	1.25872	0.69689	0.641539	0.173048	0.17827	0.104268
Slc16a1 - astrocytes																						Slc16a1 - neurons
	WT								KO														WT								KO
E3	1.17688	0.487162	0.218485	2.05074	0.85159	1.00935	2.57023	1.76205	0.605518	1.77604	0.439383	0.465295	0.737666									E3	1.1583	2.52471	0.456092	0.259034	1.66374	2.20343	1.83271	0.430803	0.0785373	0.392011	0.232574	0.152631	0.167844
E4	3.37728	2.891	4.02376	3.05644	1.17381	3.7505	1.85599		1.36609	0.854942	1.27966	1.76425	2.14073	1.24586	2.52244							E4	0.869137	0.631075	0.495159	0.188576	0.382869	0.401392	0.575963		3.49158	3.68433	1.52779	1.28568	0.377551	0.649668	0.205661
Slc22a5 - astrocytes																						Slc22a5 - neurons
	WT								KO														WT								KO
E3	0.555514	0.560933	0.571668	2.43033	0.73651	1.29947	3.19188	0.756123		0.94928	2.12518	1.05925	0.507449									E3	0.623986	1.77911	1.17348	1.21055	2.39582	1.07476	0.454901	0.541356	0.502841	1.20334	0.291175	0.645683	0.551428
E4	1.4238	0.595084	0.575797	1.76386	0.632276	8,43614979*	1.76895		0.736421	0.536034	1.17814	1.49147	1.18572	1.82734	1.31095							E4	0.821476	0.88414	0.240513	0.773206	0.413303	0.275804	0.643839		0.762639	1.12909	0.567759	0.482207	0.376247	0.215786	0.306522
