# Supplementary material for: Interaction of sortilin with apolipoprotein E3 enables neurons to use long-chain fatty acids as alternative metabolic fuel
Source: Springer Nature journal article supplement (doi:10.1038/s42255-025-01389-5), 2025-10-16
Supplement: MOESM7 [file 42255_2025_1389_MOESM7_ESM.xlsx]

## Sheet: Fig 4a-d
Figure 4a-d
E3WT						E3KO						E4WT						E4KO
	Control	Etomoxir	UK5099				Control	Etomoxir	UK5099				Control	Etomoxir	UK5099				Control	Etomoxir	UK5099
	100	88	23				100	99	32				100	106	82				100	111	89
	100	86	67				100	125	69				100	108	87				100	121	62
	100	89	69				100	128	76				100	101	79				100	108	79

## Sheet: Fig 4g
Figure 4g
E4WT iAs CM	E3WT iAs CM
110	89
99	87
102	87
105	84
101	92

## Sheet: Fig 4h
Fig.4h
	burst duration [ms]			burst spike count			network burst count
	E3WT	E3KO		E3WT	E3KO		E3WT	E3KO
	579.741	621.701		47.087	55.183		16	13
	561.034	565.099		51.241	38.678		12	13
	469.472	620.18		45.187	46.241		16	16
	516.026	301.288		39.575	30.418		19	14
	204.806	417.722		18.585	40.141		18	11
	393.11	449.85		42.382	40.375		16	12
	412.686	322.763		37.895	25.823		14	16
	220.715	138.321		22.477	7.422		16	10
	293.588	720.084		28.903	70.01		23	11
	538.45	590.434		46.407	40.761		15	22
	369.38	522.711		32.323	36.088		14	5
	251.746	422.729		21.753	23.647		28	17
	285.83	441.295		11.828	26.03		10	21
	489.385	301.273		31.354	16.823		17	25
	476.775	41.374		24.625	62.298		15	11
	112.405	145.547		5.429	8.246		0	15
	357.967	343.082		24.258	20.012		11	19
	244.338	602.205		17.429	41.84		17	9
	424.606	367.542		29.705	22.916		4	14
	462.046	351.535		35.915	19.559		2	16
	335.96	448.986		20.86	26.684		12	14
	336.374	521.655		16.796	32.522		17	5
	322.525	489.19		18.445	33.233		14	25
	273.949	202.803		14.75	7.817		6	61
	245.864	230.902		9.944	10.923		60	37
	280.686	241.671		13.652	12.526		45	64
	349.016	269.82		17.422	13.279		49	12
	210.198	273.024		8.531	13.218		38	17
	338.915	187.743		17.312	8.275		13	38
	341.669	338.535		16.907	19.188		12	10
	293.909	337.056		14.134	17.986		29	22
	468.201	343.486		27.332	19.592		15	34
	374.085	349.932		20.178	19.391		10	39
	348.462	288.217		18.631	15.371		48	43
	412.975	165.206		25.409	6.375		27	25
	317.301			17.906			33

## Sheet: Fig 4i
Fig. 4i
	E3WT		E3WT		E3KO		E3KO
	Col. A	Col. B	Col. C	Col. D	Col. E	Col. F	Col. G	Col. H
	pre: Glc + PA	48h: PA	pre: Glc	48h: -	pre: Glc + PA	48h: PA	pre: Glc	48h: -
	1074.82	407.168	523.558	327.969	806.829	109.327	522.63	151.4
	952.487	353.121	332.139	0	453.252	327.829	120.549	0
	94.406	342.637	511.506	205.719	110.489	289.583	323.573	110.104
	723.578	352.02	752.429	440.123	86.997	0	803.729	653.955
	390.932	222.535	439.282	357.948	671.269	0	754.109	448.207
	127.254	173.259	531.91	380.652	480.68	270.846	546.327	0
	492.508	292.307	396.557	294.641	552.32	263.326	428.017	210.463
	598.037	302.997	394.124	101.939	359.595	120.747	243.126	197.99
	210.173	294.456	344.566	335.68	532.545	227.92	335.218	282.712
	305.269	312.165	380.796	203.343	453.794	232.625	549.41	273.112
	354.855	442.592	371.249	276.167	167.902	239.803	449.822	236.016
	344.855	152.956	332.167	188.741			482.371	219.714

## Sheet: Fig 4j
Fig.4j
		E3WT		E3WT		E3KO		E3KO
		Col. A	Col. B	Col. C	Col. D	Col. E	Col. F	Col. G	Col. H
		pre: Glc + PA	48h: PA	pre: Glc	48h: -	pre: Glc + PA	48h: PA	pre: Glc	48h: -
		98.701	38.892	48.752	31.133	78.652	8.144	45.107	6
		94.999	37.841	32.053	0	25.734	27.098	7.405	0
		5.655	34.079	49.976	12.644	4.968	19.885	22.257	7.563
		66.956	34.469	67.2	37.358	5.638	0	84.613	53.288
		42.212	11.647	41.253	34.472	78.429	0	56.831	37.893
		10.372	10.108	48.096	34.857	27.355	14.55	35.077	0
		29.652	15.432	26.905	20.318	35.45	15.209	28.969	16.224
		41.89	16.739	27.58	6.668	18.711	5.951	13.741	10.535
		8.591	15.237	22.122	22.475	42.662	15.336	17.414	14.013
		16.924	16.476	20.566	9.368	31.852	16.476	41.157	17.297
		24.34	36.268	22.096	16.228	7.745	14.106	30.276	12.317
		23.695	11.259	17.404	7.187			31.284	12.747

## Sheet: Fig 4k
Fig.4k
	E3WT		E3WT		E3KO		E3KO
	Col. A	Col. B	Col. C	Col. D	Col. E	Col. F	Col. G	Col. H
	pre: Glc + PA	48h: PA	pre: Glc	48h: -	pre: Glc + PA	48h: PA	pre: Glc	48h: -
	14	19	17	26	26	36	25	0
	15	5	22	0	26	27	14	0
	8	33	25	12	1	8	21	0
	21	38	17	14	17	0	21	0
	30	0	19	15	27	0	34	30
	40	0	20	17	36	11	24	0
	30	2	2	0	40	15	19	0
	33	11	7	16	34	0	15	0
	15	10	24	4	23	15	17	0
	26	12	23	0	24	18	21	11
	21	6	21	10	26	21	20	0
	23	3	14	0			28	7
