# Supplementary material for: Interaction of sortilin with apolipoprotein E3 enables neurons to use long-chain fatty acids as alternative metabolic fuel
Source: Springer Nature journal article supplement (doi:10.1038/s42255-025-01389-5), 2025-10-16
Supplement: MOESM8 [file 42255_2025_1389_MOESM8_ESM.xlsx]

## Sheet: Fig 5a
Fig. 5a
ω-3 PUFA							DHA							ω-6 PUFA							C22:5n-3							C14:0							C16:1n-7							C20:1n-9							ARA
E3WT	E3KO						E3WT	E3KO						E3WT	E3KO						E3WT	E3KO						E3WT	E3KO						E3WT	E3KO						E3WT	E3KO						E3WT
1.5	0.91						0.69	0.17						5.9	3.29						0.49	0.36						1.86	1.15						1.45	0.73						3.26	1.28						2.6
1.61	0.87						0.69	0.14						6.23	2.92						0.49	0.3						1.88	1.08						1.54	0.72						3.17	1.21						2.27
1.49	0.69						0.66	0.12						6.12	2.42						0.5	0.27						2.01	0.79						1.58	0.58						3.44	0.99						2.58
1.63	1.05						0.73	0.14						6.23	3.39						0.54	0.27						1.9	1.3						1.47	0.67						3.29	1.03						2.85
1.63	0.56						0.69	0.16						6.45	3.12						0.53	0.28						1.81	0.4						1.49	0.43						3.22	0.35						2.69
1.41	0.6						0.61	0.18						5.7	3.23						0.49	0.28						1.92	0.47						1.45	0.48						2.97	0.42						2.43
1.65	0.58						0.89	0.17						6.26	3						0.52	0.29						2.45	0.42						1.35	0.44						2.59	0.39						3.46
1.68	0.6						0.87	0.19						6.06	3.13						0.52	0.3						2.17	0.47						1.41	0.5						2.46	0.44						3.03
1.34	0.69						0.72	0.22						5.03	3.77						0.41	0.33						1.89	0.48						1.03	0.58						1.92	0.61						2.78
1.23							0.64							4.43							0.38							1.67							0.98							1.88							2.38
1.21							0.63							4.48							0.39							1.74							1.01							1.94							2.36
1.57							0.63							5.56							0.58							1.77							0.98							2.3							3.12
1.72							0.78							5.96							0.66							2.15							1.13							2.54							3.52
1.62							0.74							5.4							0.54							2.11							1.13							2.12							3.23
1.52							0.65							5.11							0.51							1.9							1.07							2.08							3.01
1.58							0.75							5.73							0.59							2.39							1.2							2.46							3.37
1.58							0.67							5.36							0.53							1.96							1.18							2.39							3.02
[truncated: 15 more columns]

## Sheet: Fig 5b
Fig. 5b
ω-3 PUFA							DHA							ω-6 PUFA							C22:5n-3							C14:0							C16:1n-7							C20:1n-9							ARA
E3WT	E3KO						E3WT	E3KO						E3WT	E3KO						E3WT	E3KO						E3WT	E3KO						E3WT	E3KO						E3WT	E3KO						E3WT
245.32	343.81						99.51	68.58						769.84	642.32						47.19	45.48						130.72	129.51						199.63	103.65						29.39	17.49						137.94
266.96	598,83*						47.73	39.47						355.9	839.02						30.85	28.96						149.32	510.8						74.61	70.84						15.65	22.78						66.05
266.27	407.31						37.88	121.47						538.03	1062.63						28.05	43.69						146.56	60.98						70.96	153.8						11.81	31.29						60.61
196.07	279.46						64.19	34.02						671.53	937.96						37.73	35.41						48.8	89.43						135.24	140.57						22.1	14.79						84.88
228.64	212.09						58.62	24.91						344.9	1017.03						54.11	48.05						12.29							170.25	95.53						209,12*	21.4						76.2
215.41	250.24						56.65	8.7						480.44	1000.02						41.8	35.1						4.91							166.97	90.7						244,69*	88.72						79.74
278.76	221.78						80.84	33.58						402.31							60.91	40.32						86.9							185.68	153.37						37.72	184,43*						49.07
46,93*	288.38						12.04	14.93						820.74							7.08	57.89						53.94							31.61	176.26						11.47	571,83*						26.38
54,79*	289.95						11.67	81.66						660.5							4.33	42.46						28.07							35.22	81.29						11.58	20.73						25.56
114.31	279.06						50.81	76.71						1799,14*							24.97	40.43						365.1							131.65	83.26						28.84	17.67						96.47
260.46	260.87						57.76	48.84													44.44	33.68													136.94	64.99						16.52	16.83						220.19
199.11	282.68						64.24	55.35													31.35	38.04													114.4	68.2						17.56	14.99						115.99
269.43							36.46	65.21													19.52														92.08	132.53						42.71	113,11*						70.92
[truncated: 13 more columns]
