# Supplementary material for: Interaction of sortilin with apolipoprotein E3 enables neurons to use long-chain fatty acids as alternative metabolic fuel
Source: Springer Nature journal article supplement (doi:10.1038/s42255-025-01389-5), 2025-10-16
Supplement: MOESM9 [file 42255_2025_1389_MOESM9_ESM.xlsx]

## Sheet: Fig 6a
Fig. 6a
Well	Gene Symbol	Fold Change
		Group 1/Control Group	log2 fold change
A11	ANGPTL4	0.01	-6.64386
B03	APOE	0.01	-6.64386
E03	MMP9	0.02	-5.64386
A09	ACSL5	0.03	-5.05889
E11	PLTP	0.06	-4.05889
G06	SLC27A6	0.08	-3.64386
D05	FGR	0.08	-3.64386
B12	CYP27A1	0.09	-3.47393
A02	ACADL	0.12	-3.05889
G12	UCP1	0.12	-3.05889
F02	PPARG	0.15	-2.73697
B06	CLU	0.17	-2.55639
F06	HELZ2	0.24	-2.05889
G01	SLC22A5	0.31	-1.68966
G11	TXNIP	0.32	-1.64386
D10	KLF10	0.35	-1.51457
B08	CPT1B	0.35	-1.51457
B07	CPT1A	0.37	-1.4344
G05	SLC27A5	0.38	-1.39593
G02	SLC27A1	0.4	-1.32193
C12	FABP4	0.41	-1.2863
E06	NR1H3	0.46	-1.12029
C06	ELN	0.48	-1.05889
F08	RXRA	0.48	-1.05889
E12	PPARA	0.51	-0.971431
A01	ACAA2	0.52	-0.943416
E02	MLYCD	0.55	-0.862496
A04	ACOX1	0.59	-0.761213
A12	APOA1	0.62	-0.68966
B09	CPT2	0.62	-0.68966
C05	EHHADH	0.65	-0.621488
E09	PCK2	0.65	-0.621488
F04	PPARGC1B	0.67	-0.577767
D07	HIF1A	0.68	-0.556393
F09	RXRB	0.71	-0.494109
G10	TGS1	0.72	-0.473931
D09	ILK	0.72	-0.473931
F01	PPARD	0.75	-0.415037
C07	EP300	0.8	-0.321928
F03	PPARGC1A	0.81	-0.304006
B10	CREB1	0.82	-0.286304
C03	DGAT1	0.82	-0.286304
D11	LPIN1	0.82	-0.286304
E04	NCOA3	0.82	-0.286304
F12	SIRT1	0.85	-0.234465
G09	SRC	0.85	-0.234465
F05	PPRC1	0.87	-0.200913
C04	ECH1	0.88	-0.184425
B05	CHD9	0.9	-0.152003
D12	LPL	0.91	-0.136062
G08	SORBS1	0.94	-0.0892673
E07	OLR1	0.99	-0.0144996
A05	ACOX3	1.02	0.0285692
A07	ACSL3	1.03	0.0426443
E10	PDPK1	1.03	0.0426443
C08	ETFDH	1.1	0.137504
E05	NCOA6	1.1	0.137504
G04	SLC27A4	1.11	0.15056
F07	PTEN	1.15	0.201634
E01	MED1	1.19	0.250962
B11	CREBBP	1.19	0.250962
C11	FABP3	1.21	0.275007
A06	ACSL1	1.22	0.286881
D04	FADS2	1.24	0.31034
A08	ACSL4	1.27	0.344828
A03	ACADM	1.34	0.422233
G07	SMARCD3	1.39	0.475085
F11	SCD	1.47	0.555816
D01	FABP5	1.56	0.641546
C01	CYP4A11	1.81	0.85599
D03	FABP7	1.88	0.910733
D06	GK	2.22	1.15056
C10	FABP2	2.71	1.43829
B04	CD36	3.48	1.79909
F10	RXRG	3.56	1.83188
D02	FABP6	4.03	2.01078
A10	ADIPOQ	2.71	1.43829		Excluded from analysis: sample run undetected
B01	APOA5	34.94	5.12681
B02	APOC3	2.71	1.43829
C02	CYP7A1	3.04	1.60407
C09	FABP1	0.31	-1.68966
D08	HMGCS2	2.71	1.43829
E08	PCK1	2.71	1.43829
G03	SLC27A2	0.11	-3.18442

## Sheet: Fig 6b
Fig. 6b-c
Fold Difference:			2
Arrays included in Test Group:			E3KO sample2
Arrays included in Control Group:			E3WT sample1
Genes Over-Expressed in							Genes Under-Expressed in
Group 1 vs. Control Group							Group 1 vs. Control Group
Position	Gene Symbol	Fold Regulation	Comment	Assay Catalog #			Position	Gene Symbol	Fold Regulation	Comment	RT2Catalog
A10	ADIPOQ	2.71	C	PPH00441F			A02	ACADL	-8.04	A	PPH01692C
B01	APOA5	34.94		PPH02618B			A09	ACSL5	-34.25	A	PPH06335A
B02	APOC3	2.71	C	PPH01996A			A11	ANGPTL4	-149.19	A	PPH02234F
B04	CD36	3.48		PPH01356A			B03	APOE	-67.48	A	PPH01366D
C02	CYP7A1	3.04		PPH01231A			B06	CLU	-6.01		PPH00243F
C10	FABP2	2.71	C	PPH02441A			B07	CPT1A	-2.70	A	PPH15298E
D02	FABP6	4.03		PPH02466A			B08	CPT1B	-2.87		PPH20905B
D06	GK	2.22		PPH01092A			B12	CYP27A1	-11.25	A	PPH01277A
D08	HMGCS2	2.71	C	PPH09642A			C06	ELN	-2.07	A	PPH06895F
E08	PCK1	2.71	C	PPH02304F			C09	FABP1	-3.25		PPH01718A
F10	RXRG	3.56		PPH01251F			C12	FABP4	-2.44		PPH02382F
							D05	FGR	-11.96	A	PPH00093F
excluded from analysis: undetected sample run							D10	KLF10	-2.84		PPH00410A
							E03	MMP9	-42.10	A	PPH00152E
							E06	NR1H3	-2.16	A	PPH01276C
							E11	PLTP	-15.90		PPH01426A
							F02	PPARG	-6.88	A	PPH02291G
							F06	HELZ2	-4.24	A	PPH02218A
							F08	RXRA	-2.07	A	PPH01244F
							G01	SLC22A5	-3.23	A	PPH08052A
							G02	SLC27A1	-2.47	A	PPH17902A
							G03	SLC27A2	-8.92		PPH07803A
							G05	SLC27A5	-2.65		PPH16732B
							G06	SLC27A6	-12.50	A	PPH09394A
							G11	TXNIP	-3.15		PPH02855A
							G12	UCP1	-8.56		PPH02223A

## Sheet: Fig 6d
Fig. 6d
	PPARA							PPARD							PPARG
	E3WT	E3KO						E3WT	E3KO						E3WT	E3KO
	0.958944	0.597466						1.04001	0.806183						0.907359	0.443344
	1.02528	0.835737						0.961527	0.881179						0.963773	0.423792
	1.0171	0.521415						0.935758	1.08064						1.14353	4.05623
	1.01737	0.733139						0.963146	1.09259						0.767998	2.23993
	0.971005	0.695474						1.10954	1.16095						1.07394	2.88093
	1.01228	0.772168						1.166	0.774304						1.21244	1.59763
	1.049	0.726588						0.947923	0.947476						0.987	0.971627
	0.860792	0.748184						0.904461	1.07586						0.848411	1.44597
	1.10767														1.19381

## Sheet: Fig 6e
Fig. 6e
	E3WT	E3KO	E4WT	E4KO
	1.608	0.351871	0.455962	0.364598
	1.70978	0.402882	0.3645	0.376631
	1.17371	0.334097	0.425865	0.368175
	0.849621	0.191013	0.571895	0.41251
	0.879858	0.106396	0.444672	0.363635
	0.765218	0.162554	0.435365	0.350535
	0.705428	0.243042
	1.04327	0.222507
	0.635566	0.206046
	0.489422	0.1367
	0.470853	0.755222
	2.59943	0.562204
	1.5739	0.710058
	1.06405	0.776845
	1.15468	0.722082

## Sheet: Fig 6g
Fig. 6g
	E3WT	E3KO	E4WT	E4KO
	0.841169	0.228883	0.279687	0.220329
	1.16441	0.294792	0.370279	0.395138
	0.994423	0.243079	0.454607	0.296952
	0.858133	0.171665	0.258718	0.323873
	0.69425	0.306825	0.290816	0.25131
	1.44762	0.319945	0.241131	0.276234

## Sheet: Fig 6h 6i
Fig. 6 h-i
	FABP7							FABP6
	E3WT	E3KO						E3WT	E3KO
	1.26554	0.461529						0.907538	2.78098
	0.68952	0.400617						1.06156	2.2222
	0.629963	0.384495						1.05246	2.54742
	0.955746	0.341832						1.81386	4.17945
	1.33702	0.474545						0.347239	6.18994
