# Supplementary material for: Interaction of sortilin with apolipoprotein E3 enables neurons to use long-chain fatty acids as alternative metabolic fuel
Source: Springer Nature journal article supplement (doi:10.1038/s42255-025-01389-5), 2025-10-16
Supplement: MOESM11 [file 42255_2025_1389_MOESM11_ESM.xlsx]

## Sheet: Fig 7a
Fig. 7a
	PPARA
	non-treated	50 uM Bezafibrate	100 uM Bezafibrate
	1.177	2.471	3.544
	1.53	3.157	3.332
	0.715	2.101	2.523
	0.726	2.062	3.102
	0.974	2.77	2.738
	1.097	2.938	2.658
	CPT1A
	non-treated	50 uM Bezafibrate	100 uM Bezafibrate
	0.703	0.924	1.411
	1.297	1.6	1.531
	0.934	1.101	1.436
	0.93	1.092	1.955
	1.189	1.28	1.558
	1.061	1.55	1.801

## Sheet: Fig 7c
Fig. 7c
	No Treatment	10 uM Bezafibrate	50 uM Bezafibrate	100 uM Bezafibrate
	115	90	71	64
	92	78	68	69
	107	82	74	69
	102		82	77
	94		78

## Sheet: Fig 7d
Fig. 7d
	PPARA
	non-treated	50 uM Bezafibrate	100 uM Bezafibrate
	0.901	3.363	3.828
	0.997	3.418	4.178
	0.985	2.782	3.941
	0.975	3.665	3.815
	1.037	2.835	3.427
	1.118	2.821	4.463
	CPT1A
	non-treated	50 uM Bezafibrate	100 uM Bezafibrate
	1.012	1.284	1.327
	0.88	0.968	1.323
	1.086	1.285	1.636
	0.958	1.281	1.772
	1.042	1.234	1.33
	1.036	1.198	1.32

## Sheet: Fig 7f
Fig. 7f
	No Treatment	100 uM Bezafibrate
	99	91
	104	92
	118	89
	103	90

## Sheet: Fig 7g
Fig. 7g
		PPARA
		non-treated	50 uM Bezafibrate	100 uM Bezafibrate
		0.826	3.817	3.931
		0.879	3.517	3.917
		1.105	4.642	4.618
		1.2	4.142	4.613
		1.092	3.427	3.538
		0.952	3.154	4.14
		CPT1A
		non-treated	50 uM Bezafibrate	100 uM Bezafibrate
		0.893	1.427	1.391
		0.836	1.118	1.388
		1.039	1.074	1.371
		1.095	1.052	1.484
		1.026	1.502	1.409
		1.148	1.204	1.442

## Sheet: Fig 7i
Fig. 7i
	No Treatment	100 uM Bezafibrate
	106	91
	99	93
	100	86
