# Supplementary material for: Interaction of sortilin with apolipoprotein E3 enables neurons to use long-chain fatty acids as alternative metabolic fuel
Source: Springer Nature journal article supplement (doi:10.1038/s42255-025-01389-5), 2025-10-16
Supplement: MOESM12 [file 42255_2025_1389_MOESM12_ESM.xlsx]

## Sheet: Ext Fig1d
Ext Fig.1d
Area
	E3WT	E3KO	E4WT	E4KO
	187258	67230.3	200628	80393.4
	71948.3	32736.5	28779.7	74035.8
	85285	52804.7	48021.9	61956.4
	126618	137065	59907.4	57608.2
	104187	97121.9	52757.7	95915.9
	41528.8	88039.9	111553	69138.2
	56106.8	43596.6	74874.9	17289.2
	50503.6	68931.2	410609	136512
	105012	56142.5	61924.4	61367.5
	153264	352291	37635.9	42341.6
	105592	74237.1	78252.2	231225
	211368	27921.7	50514.9	138024
	96496.1	120201	33167.3	151210
	50502.3	91912	35801.5	65484.3
	124537	16969.4	78609.7	64758
	113695	104226	31376.2	42324.7
	28575.1	81112.1	61122.9	89812.3
	102768	97532.1	54590.3	26279
	269736	90478.3	75953	28999.8
	77703.8	39745.1	119527	64880.3
	56059	148314	142707	108196
	33324	46597.6	102904	136954
	245984	101105	101814	110445
	117232	43152.6	102544	64940.5
	69422.6	32015.9	72487.3	58276.2
	62067.1	214111	104622	69966
	52209	69781.6	43914.6	118515
	56702.4	64931.1	51864	32198.4
	58648.1	158213	88197.9	35905
	57274.5	50048.3	31016.8	71128.8
	79177.2	36136.4	40326.5	158602
	59282.2	125706	71015.9	60712.7
	51207.9	73305.7	53581.8	99458.8
	79429.3	95108.7	35334.9	70013.1
	159039	121721	39805.3	32269.9
	120679	87138.6	64583	64242.5
	62458.5	113068	85836.6	123721
	85605	111619	73160.8	79151.6
	212782	112146	101880	64475.8
	32750.6	84873.3	68647.1	64771.2
	81039	111600	79352.9	43771.6
	70363	68485.3	192509	113642
	163487	100473	46607	112765
	63179	77509	40591.8	120741
	133285	165504	39017	47589.2
	109316	39462.9	346334	86002.2
	38770.5	69202.1	194024	84931.6
	62046.7	44368	108161	82728.4
	14826.3	80632.3	36305.7	40695.3
	65217.1	40646.4	111632	94199.9
	101290	141704	30909.5	66178.5
	23377.8	61805.9	75697.1	28053.4
	48074.6	25206.7	71459.9	181404
	168016	75653.9	90073.8	142064
	43438.6	66827.7	59685.4	79083.9
	53943.1	40394.2	107416	100172
	58500.1	75584.2	155054	107781
	121726	80075.4	155197	57687.3
	48785.8	82271.1	31538	351125
	113166	55113.3	37773.3	75399.9
	96916.9	119081	23208.5	428141
	137830	54055.9	180582	50673
	35607.7	39525	121922	76905.1
	46264.6	401521	79004.8	65089.1
	21261.1	73841.9	72342.4	31871
	61597.1	116812	254276	119028
	45035.9	43327.5	42004.8	182232
	165903	170537	56940.3	110928
	92120.9	73234.2	92476.5	69475
	42144.1	54468	39109.2	106990
	34909.6	84521.4	104185	128190
	53062.5	80188.3	64650.8	94756.9
	52582.7	52974.1	41203.3	222205
	91936.5	47182.8	133791	26245.3
	208368	53647.7	75646.3	167534
	81198.7	57248.9	132955	99799.3
	65862.4	40574.9	31539.8	165109
	35148.6	74978.4	85191.2	177094
	19315.6	56919.6	109152	155250
	183384	44699.2	56883.8	74218.3
	71305.7	62494.5	82792.3	176958
	50189.4	73277.5	59188.7	82284.3
	112319	36646.3	37363.1	54998.6
	35216.3	18937.5	100725	24988.4
	39747	21917.8	239235	97810.6
	98598.9	70726.2	211751	135435
	88899.7	81411.3	46408	41925.8
	82741.5	74099.7	273849	122289
	138843	109798	58628	100176
	107581	64917.9	148756	61013.8
	96411	153394	65920.8	103103
	132587	64197.3	21140.7	64065.6
	94027	129000	44650.2	34305.7
	35404	179079	27528.5	94899.9
	114522	95601.7	31440.1	34990.5
	162522	103393	158841	51886.5
	127474	90988.2	93471.8	37257.8
	108334	126790	64652.6	93129.4
	34512.6	124812	42943.7	53333.4
	29694.1	56686.3	63139.9	79874.1
	76869.3	120759	52816	27500.2
	56667.5	54981.6	61749	56786
	33634	134165	69364	51997.6
	56133.1	116454	240409	71586
	50181.9	47833.8	38311	68308.4
	121064	77070.6	207789	61995.9
	38994.4	155562	125685	95396.6
	42908	146118	108778	30431.6
	35897.4	40113.9	145891	57651.5
	78423.4	55500.9	62347.8	79168.5
	79456.4	38074.3	24542.5	116349
	28042.1	39239	66586.8	98694.9
	61868	81859.1	32104.3	24843.5
	89866.8	50402	42640.8	113273
	48620.2	66579.3	228156	31022.4
	95710.8	26523.7	145588	88022.9
	30266.1	47474.4	59275.3	78237.2
	105568	204944	173188	96568.8
	48640.9	70167.4	191117	17814.2
	60616.8	70078.9	62146.4	59523.6
	61868	234491	101241	73264.3
	63382.6	32802.3	70923.7	145221
	62929.2	53124.6	88013.5	22376.9
	52787.8	46612.7	136237	137204
	67140	35880.5	79066.9	44622
	32121.2	153500	106678	64613.1
	27191.7	34610.5	161298	53854.6
	49188.5	99061.8	155131	22422
	57256.4	29056.2	126387	31573.7
	28397.7	98124.8	155526	34185.3
	36305.7	132690	121281	70285.9
	33876.7	59367.4	63567	116059
	76018.9	54934.6	124782	53980.7
	75939.8	50080.3	107036	25370.4
	110324	96977.1	115184	26649.8
	110198	63559.5	55216.8	82004
	50763.3	181389	28567	166371
	44068.8	97229.2	29833.3	67710.1
	53967.5	152358	47449.9	42307.8
	60678.9	79877.9	38318.9	60746.6
	34966.1	53109.5	106949	40670.8
	68686.6	66082.6	59755.1	119247
	41190.1	34924.7	81571.2	34328.2
	45656.8	340035	94378.7	15703.1
	50800.9	36087.5	102840	78043.4
	59694.8	59011.8	63224.6	73341.5
	155374	61256.5	42381.1	20004.3
	160343	157413	114238	77048.1
	38825.1	117480	64853.9	121230
	26217	134564	167724	99099.4
	125091	41957.8	93819.9	69638.6
	46990.8	408840	102418	27899.1
	64016.7	333141	221977	166396
	79507.2	65858.7	88602.4	64641.3
	70180.5	47683.2	23750.4	65621.6
	97249.9	123444	22324.2	86372.8
	61422.1	69845.6	145695	85415.2
	142156	271657	39536.3	43769.7
	135631	63365.7	186180	56947.8
	61224.5	50023.8	46994.6	106356
	96316.6	69109.9	45877	123585
	44725.5	82756.6	90574.3	31950
	85023.8	79655.8	85573.2	54483
	73747.9	103130	103391	81467.7
	23654.4	105717	135144	158742
	245722	55040	45873.2	54735.2
	34298.1	62061.8	93599.8	32441.1
	40842.1	17799.1	91413.4	139462
	77168.5	36868.3	70669.7	140098
	92463.3	46417	64362.9	64265
	85975.9	22920.6	50134.9	177342
	90965.6	51444.4	56823.7	111754
	110693	58876.4	149110	55892.3
	70090.2	51256.2	191213	104599
	39812.9	50593.9	135475	236015
	43732.1	53009.8	116682	46285.3
	117166	43278.6	132959	26444.7
	185749	100200	65909.5	38911.6
	88167.8	59247	95567.8	30945.3
	69883.2	69399.7	132124	55051.3
	55873.5	31946.2	63971.5	16747.4
	37506.1	29357.3	62889.7	57388.1
	44966.3	56767.2	80184.5	25556.6
	64820.1	80133.7	26809.7	33255.8
	143187	47751	59371.2	38113.9
	58934.7	55147.2	90826.4	37336.8
	51000.4	52966.5	53237.5	17697.5
	31955.7	52945.8	165921	57570.6
	27323.4	25569.8	69339.5	25298.9
	95883.9	38569.2	113023	35005.6
	51470.7	34222.9	35775.1	103762
	224504	187489	67474.9	132792
	169854	69076.1	53521.6	46072.7
	57329.8	175457	124489	82118.7
	97283.8	30322.5	46226.9	56413.5
	28171.9	72852.3	73949.2	145274
	32125	67083.6	114609	64063.7
	98747.6	263980	74545.6	62392.9
	42923	97637.5	35927.5	71094.9
	65102.3	51527.2	91823.6	40721.6
	159167	63194.5	19701.3	145853
	45186.5	73360.3	106415	74594.6
	67399.6	77953.1	60900.9	187935
	44321	69687.6	92606.3	36719.7
	53536.6	72186.2	60434.3	67219
	66690.3	85021.9	52712.5	127143
	118186	76954	74513.6	77159.1
	100281	89646.7	59629	128336
	97931	179327	48509.2	52065.3
	86190.3	92512.2	57036.3	47536.5
	128453	82084.9	58756	59986.5
	126921	110851	49606.2	88689
	103809	95740.9	91575.2	14536.6
	40053.7	115342	148359	45369
	56325	58708.9	64880.3	105231
	47169.6	42994.5	270613	37011.3
	36849.5	121286	73759.2	51075.6
	157204	37709.3	141688	44315.3
	51384.2	60067.4	38620	89522.5
	59375	87951.4	16109.5	79902.3
	84316.4	50550.7	71838.1	76547.6
	55941.2	82207.2	67388.4	52208.3
	45329.5	58400.4	28789.1	55779.4
	104949	45130	72082.7	76120.5
	72395.1	49419.9	83200.6	71384.7
	288696	44757.5	71226.6	53484
	99312	103658	87810.3	69542.7
	39733.8	85855.4	55497.2	105220
	150732	60056.1	65687.5	157120
	69508.8	83405.7	61992.2	63222.7
	137138	49608	31442	80611.6
	78636.1	34815.6	83648.4	68609.5
	103688	69411	125200	36157.1
	35056.4	54366.4	181160	151089
	42136.5	49673.9	46586.3	35820.3
	93466.2	115437	66154.1	34066.7
	59740	44050	159872	62152.1
	96529.3	56503.8	69853.1	37940.8
	50957.1	69217.2	28535.1	70161.7
	125969	50232.7	53540.4	65632.9
	50524.3	90260.1	43342.6	198116
	65706.3	70221.9	55901.7	31566.2
	68935	132323	52266.6	75510.9
	131247	37494.8	32454.3	175602
	61743.8	96679.8	74611.5	67597.2
	40268.2	27816.3	41513.8	90619.4
	49184.7	59841.6	61171.8	52776.5
	71258.6	76980.3	68872.9	122648
	96664.7	55963.8	108230	50159.3
	71094.9	58513.2	41843	77300.2
	81076.4	37024.5	90126.5	43197.7
	126432	102238	79678.4	54789.7
	147430	70199.3	32960.4	115467
	92341	46851.6	62936.7	182686
	57316.6	114428	66267	54311.8
	36591.7	29613.2	190163	34435.5
	23479.4	62912.2	102070	59907.4
	53196.1	41148.7	82212.8	74312.3
	31479.6	137166	48518.6	41528.8
	42815.8	76841.1	20574.4	26668.6
	91883.8	59369.3	265164	133945
	92079.5	77059.3	68329.1	65847.4
	54509.4	77155.3	81249.5	99093.8
	68739.3	33515.4	64312.1	42629.5
	77973.8	109384	69804.2	116349
	63610.3	97138.9	66156	64048.7
	25853.9	21199	60724	37374.4
	52753.9	40934.2	29112.7	55871.6
	46449	35950.1	28824.8	66417.5
	99125.8	27246.2	25078.7	65156.9
	46917.5	60088.1	67373.3	45271.1
	212244	70359.3	93923.4	35301
	127535	56221.6	104040	30036.5
	63568.9	77017.9	71245.5	40253.1
	209718	202923	42100.8	31660.3
	96975.2	118296	27908.5	35509.8
	55058.8	63205.8	165030	57997.7
	63521.8	75315.2	67042.2	337692
	52008.8	94873.5	53933.6	104415
	35011.2	49711.5	88288.2	51399.2
	46687.9	63126.7	114240	48563.8
	102405	54189.5	63832.3	25014.8
	59282.8	38004.7	89720	18937.5
	95631.8	241891	100951	113659
	145546	99170.9	43037.8	141972
	21321.3	44622	42277.7	83748.1
	34277.4	57437	80227.8	73828.8
	251414	36621.8	88608.1	167730
	218504	60944.2	64746.7	35455.3
	145349	59053.2	122426	62334.6
	74511.8	46208.1	134385	43630.5
	43662.4	165248	46232.6	180552
	113390	135226	60991.2	35754.4
	299859	96373.1	71928.4	77087.6
	75428.1	110797	100240	139496
	72408.2	70746.9	75808.1	46876.1
	61149.2	205932	62221.7	46437.7
	37850.4	68250.1	89752.1	32151.3
	126684	114421	46386.9	43952.2
	32104.3	71006.5		62359.1
	44210	155195		89663.6
	79336	78954		42791.3
	41306.8	75443.1		107357
	63275.4	120592		63802.2
	22617.7	71367.8		111162
	42578.7	69377.1		40394.2
	34162.7	78681.2		57557.4
	69706.4	50906.3		232518
	86788.7	57527.3		107890
	37942.6	54537.6		157983
	157656	85324.8		43005.8
	37331.2	90583.7		31517.3
	138766	104800		29756.2
	56560.2	57593.2		198242
	79430.1	64184.1		214860
	128312	43086.7		80579.7
	56786	169660		42672.8
	75040.5	49288.2		54232.8
	30715.7	143140		42055.6
	50797.2	159543		194280
	44531.7	78760.2		53412.5
	35139.2	27453.2		106785
	58268.7	27052.4		72735.6
	70103.4	26841.7		42134.7
	49431.2			115660
	83751.9			41357.6
	67330			49553.5
	122995			58360.8
	360431			15659.9
	81230.7			75800.6
	108452			65802.2
	58244.2			56733.3
	60424.9			39863.7
	83499.8			33489.1
	42046.2			37355.6
	187694			56771
	32751.5			252795
	26873.7			57075.8
	43293.7			96790.8
	29592.5			36922.9
				52614.7
				18252.6
				58025.9
				56917.7
				19994.9
				60678.9
				32794.8
Circularity
	E3WT	E3KO	E4WT	E4KO
	0.905	0.803	0.343	0.395
	0.389	0.859	0.947	0.72
	0.637	0.864	0.661	0.732
	0.851	0.739	0.432	0.912
	0.884	0.898	0.584	0.645
	0.924	0.738	0.764	0.671
	0.672	0.909	0.801	0.895
	0.706	0.527	0.95	0.939
	0.345	0.839	0.935	0.525
	0.627	0.621	0.801	0.46
	0.437	0.659	0.451	0.534
	0.795	0.9	0.806	0.916
	0.872	0.702	0.878	0.575
	0.912	0.339	0.648	0.682
	0.876	0.919	0.442	0.883
	0.909	0.678	0.928	0.662
	0.847	0.854	0.882	0.458
	0.707	0.178	0.866	1
	0.598	0.851	0.726	0.834
	0.33	0.889	0.676	0.885
	0.722	0.634	0.62	0.921
	0.87	0.928	0.827	0.436
	0.548	0.84	0.947	0.907
	0.506	0.856	0.872	0.948
	0.623	0.839	0.948	0.449
	0.531	0.85	0.663	0.94
	0.931	0.927	0.807	0.399
	0.864	0.644	0.921	0.865
	0.944	0.708	0.891	0.742
	0.712	0.852	0.87	0.424
	0.59	0.83	0.926	0.793
	0.401	0.703	0.517	0.806
	0.645	0.491	0.935	0.559
	0.6	0.703	0.879	0.913
	0.765	0.838	0.702	0.88
	0.695	0.828	0.867	0.806
	0.46	0.847	0.627	0.682
	0.386	0.516	0.762	0.893
	0.829	0.613	0.858	0.887
	0.834	0.759	0.662	0.904
	0.612	0.581	0.755	0.935
	0.519	0.409	0.727	0.86
	0.87	0.737	0.744	0.307
	0.782	0.767	0.862	0.735
	0.908	0.921	0.932	0.951
	0.801	0.905	0.799	0.946
	0.909	0.747	0.944	0.93
	0.629	0.908	0.736	0.663
	0.928	0.916	0.913	0.865
	0.828	0.788	0.476	0.665
	0.869	0.828	0.742	0.642
	0.891	0.673	0.92	0.83
	0.645	0.924	0.574	0.926
	0.632	0.908	0.917	0.949
	0.573	0.763	0.877	0.45
	0.866	0.874	0.526	0.851
	0.922	0.676	0.82	0.425
	0.439	0.679	0.827	0.957
	0.88	0.929	0.888	0.872
	0.55	0.939	0.931	0.454
	0.91	0.723	0.888	0.437
	1	0.607	0.962	0.878
	0.416	0.749	0.809	0.378
	0.899	0.759	0.586	0.46
	0.927	0.771	0.595	0.824
	0.598	0.923	0.827	0.932
	0.684	0.907	0.918	0.928
	0.918	0.417	0.883	0.545
	0.888	0.787	0.476	0.319
	0.62	0.526	0.788	0.75
	0.759	0.85	0.586	0.653
	0.528	0.456	0.875	0.914
	0.652	0.811	0.509	0.891
	0.449	0.896	0.903	0.882
	0.916	0.799	0.932	0.936
	0.854	0.605	0.542	0.538
	0.819	0.531	0.875	0.619
	0.689	0.86	0.709	0.241
	0.724	0.778	0.875	0.604
	0.662	0.73	0.736	0.931
	0.548	0.755	0.776	0.906
	0.838	0.677	0.74	0.463
	0.4	0.902	0.665	0.493
	0.908	0.892	0.799	0.935
	0.609	0.904	0.59	0.762
	0.933	0.378	0.758	0.849
	0.914	0.732	0.879	0.934
	0.929	0.679	0.871	0.935
	0.91	0.801	0.921	0.236
	0.604	0.757	0.917	0.928
	0.866	0.769	0.944	0.89
	0.931	0.768	0.872	0.84
	0.923	0.916	0.794	0.865
	0.859	0.587	0.916	0.422
	0.78	0.925	0.895	0.94
	0.419	0.789	0.824	0.925
	0.755	0.82	0.89	0.798
	0.49	0.531	0.672	0.901
	0.899	0.823	0.867	0.84
	0.895	0.887	0.906	0.905
	0.694	0.387	0.729	0.911
	0.809	0.855	0.882	0.93
	0.924	0.285	0.915	0.958
	0.574	0.613	0.95	0.665
	0.891	0.901	0.622	0.959
	0.817	0.904	0.878	0.943
	0.807	0.348	0.64	0.958
	0.902	0.408	0.899	0.957
	0.892	0.809	0.47	0.946
	0.63	0.838	0.748	0.913
	0.649	0.486	0.927	0.815
	0.781	0.949	0.304	0.465
	0.796	0.803	0.937	0.932
	0.437	0.386	0.896	0.676
	0.505	0.915	0.851	0.893
	0.834	0.766	0.799	0.928
	0.788	0.85	0.946	0.734
	0.812	0.901	0.323	0.667
	0.649	0.571	0.887	0.933
	0.843	0.911	0.569	0.942
	0.663	0.882	0.919	0.437
	0.35	0.891	0.544	0.935
	0.542	0.645	0.9	0.769
	0.943	0.911	0.686	0.923
	0.53	0.875	0.657	0.56
	0.881	0.763	0.869	0.637
	0.823	0.917	0.913	0.94
	0.803	0.77	0.947	0.936
	0.716	0.842	0.498	0.906
	0.787	0.869	0.7	0.753
	0.837	0.692	0.926	0.904
	0.875	0.629	0.872	0.864
	0.88	0.397	0.722	0.571
	0.848	0.533	0.895	0.719
	0.839	0.52	0.917	0.731
	0.754	0.816	0.852	0.932
	0.893	0.869	0.905	0.961
	0.825	0.487	0.927	0.786
	0.8	0.91	0.743	0.621
	0.867	0.745	0.84	0.948
	0.791	0.84	0.878	0.877
	0.72	0.824	0.945	0.882
	0.888	0.5	0.664	0.857
	0.92	0.89	0.846	0.883
	0.902	0.708	0.456	0.924
	0.722	0.805	0.92	0.774
	0.338	0.927	0.619	0.721
	0.642	0.878	0.612	0.65
	0.913	0.529	0.865	0.804
	0.716	0.897	0.928	0.839
	0.813	0.903	0.929	0.881
	0.87	0.929	0.646	0.527
	0.803	0.924	0.813	0.934
	0.307	0.879	0.643	0.907
	0.623	0.497	0.897	0.928
	0.863	0.819	0.903	0.34
	0.485	0.941	0.492	0.874
	0.774	0.908	0.903	0.818
	0.66	0.502	0.807	0.667
	0.751	0.552	0.816	0.396
	0.462	0.833	0.879	0.938
	0.927	0.321	0.875	0.882
	0.74	0.889	0.618	0.937
	0.856	0.549	0.615	0.81
	0.89	0.559	0.897	0.664
	0.769	0.906	0.736	0.788
	0.875	0.802	0.441	0.439
	0.856	0.637	0.688	0.807
	0.436	0.931	0.753	0.455
	0.914	0.586	0.438	0.933
	0.808	0.862	0.721	0.929
	0.905	0.521	0.953	0.953
	0.327	0.861	0.539	0.516
	0.55	0.874	0.918	0.743
	0.897	0.482	0.286	0.86
	0.796	0.782	0.717	0.58
	0.912	0.916	0.909	0.626
	0.555	0.774	0.825	0.93
	0.798	0.659	0.633	0.892
	0.474	0.776	0.768	0.94
	0.777	0.899	0.652	0.864
	0.872	0.914	0.735	0.855
	0.844	0.559	0.725	0.897
	0.829	0.81	0.851	0.866
	0.593	0.31	0.929	0.948
	0.593	0.734	0.651	0.914
	0.906	0.41	0.846	0.875
	0.89	0.254	0.578	0.836
	0.869	0.858	0.333	0.86
	0.461	0.861	0.849	0.731
	0.682	0.451	0.908	0.478
	0.934	0.876	0.437	0.902
	0.915	0.906	0.827	0.627
	0.885	0.937	0.299	0.917
	0.802	0.676	0.948	0.514
	0.924	0.9	0.933	0.554
	0.943	0.482	0.607	0.757
	0.381	0.942	0.846	0.617
	0.887	0.854	0.889	0.858
	0.724	0.91	0.939	0.828
	0.808	0.93	0.827	0.546
	0.721	0.543	0.59	0.458
	0.544	0.767	0.628	0.484
	0.798	0.9	0.9	0.943
	0.357	0.407	0.882	0.398
	0.253	0.536	0.59	0.945
	0.836	0.545	0.482	0.81
	0.79	0.41	0.778	0.515
	0.727	0.947	0.931	0.922
	0.495	0.563	0.841	0.879
	0.917	0.798	0.79	0.566
	0.435	0.346	0.919	0.936
	0.757	0.865	0.894	0.948
	0.871	0.46	0.938	0.576
	0.777	0.931	0.889	0.728
	0.796	0.641	0.801	0.727
	0.72	0.38	0.935	0.919
	0.63	0.46	0.549	0.939
	0.514	0.775	0.611	0.547
	0.755	0.373	0.768	0.928
	0.893	0.919	0.935	0.904
	0.871	0.919	0.631	0.882
	0.803	0.923	0.687	0.848
	0.681	0.88	0.907	0.713
	0.825	0.503	0.535	0.899
	0.335	0.91	0.511	0.883
	0.874	0.892	0.822	0.855
	0.905	0.612	0.402	0.731
	0.526	0.566	0.578	0.188
	0.701	0.842	0.887	0.393
	0.906	0.78	0.902	0.898
	0.812	0.881	0.538	0.931
	0.327	0.876	0.929	0.872
	0.895	0.693	0.85	0.617
	0.863	0.881	0.873	0.881
	0.688	0.793	0.866	0.626
	0.891	0.946	0.437	0.743
	0.919	0.652	0.9	0.553
	0.898	0.401	0.764	0.708
	0.473	0.69	0.936	0.75
	0.934	0.84	0.795	0.938
	0.909	0.935	0.884	0.924
	0.899	0.935	0.88	0.483
	0.911	0.734	0.936	0.889
	0.603	0.654	0.41	0.896
	0.891	0.9	0.89	0.728
	0.894	0.5	0.852	0.781
	0.93	0.619	0.46	0.785
	0.54	0.826	0.832	0.495
	0.758	0.888	0.885	0.866
	0.322	0.718	0.94	0.934
	0.582	0.718	0.905	0.436
	0.681	0.779	0.735	0.402
	0.909	0.9	0.611	0.734
	0.684	0.871	0.835	0.519
	0.931	0.923	0.508	0.902
	0.809	0.929	0.715	0.742
	0.744	0.558	0.694	0.937
	0.872	0.919	0.628	0.829
	0.425	0.877	0.81	0.866
	0.916	0.936	0.952	0.799
	0.535	0.156	0.938	0.486
	0.907	0.403	0.949	0.559
	0.581	0.425	0.953	0.557
	0.867	0.352	0.886	0.955
	0.378	0.788	0.896	0.795
	0.918	0.838	0.883	0.84
	0.823	0.741	0.757	0.747
	0.73	0.901	0.937	0.79
	0.752	0.929	0.893	0.665
	0.904	0.625	0.689	0.853
	0.645	0.547	0.855	0.808
	0.918	0.44	0.939	0.841
	0.919	0.765	0.872	0.877
	0.829	0.929	0.571	0.838
	0.329	0.376	0.752	0.77
	0.911	0.801	0.878	0.733
	0.648	0.474	0.935	0.801
	0.784	0.716	0.659	0.94
	0.541	0.911	0.686	0.752
	0.668	0.925	0.764	0.753
	0.732	0.532	0.944	0.928
	0.599	0.934	0.538	0.884
	0.882	0.34	0.865	0.73
	0.627	0.876	0.65	0.743
	0.826	0.697	0.806	0.714
	0.798	0.672	0.773	0.687
	0.756	0.834	0.697	0.502
	0.801	0.539	0.907	0.798
	0.851	0.547	0.355	0.817
	0.624	0.523	0.903	0.671
	0.852	0.703	0.919	0.944
	0.868	0.913	0.422	0.949
	0.779	0.925	0.904	0.422
	0.482	0.789	0.585	0.908
	0.392	0.924	0.835	0.734
	0.858	0.766	0.707	0.741
	0.845	0.72	0.432	0.887
	0.631	0.872	0.821	0.343
	0.822	0.865		0.709
	0.851	0.936		0.68
	0.745	0.808		0.781
	0.668	0.954		0.811
	0.7	0.789		0.665
	0.851	0.625		0.471
	0.774	0.441		0.92
	0.87	0.816		0.349
	0.894	0.726		0.955
	0.91	0.442		0.885
	0.854	0.529		0.551
	0.599	0.935		0.335
	0.938	0.814		0.772
	0.517	0.532		0.753
	0.546	0.792		0.609
	0.432	0.895		0.613
	0.827	0.837		0.608
	0.541	0.857		0.814
	0.83	0.876		0.667
	0.859	0.613		0.625
	0.717	0.273		0.529
	0.764	0.35		0.935
	0.829	0.845		0.544
	0.896	0.758		0.853
	0.742	0.779		0.825
	0.354			0.899
	0.741			0.842
	0.463			0.838
	0.667			0.651
	0.724			0.935
	0.828			0.719
	0.896			0.919
	0.601			0.708
	0.555			0.85
	0.745			0.939
	0.879			0.968
	0.932			0.872
	0.928			0.956
	0.875			0.556
	0.67			0.543
	0.768			0.704
				0.886
				0.902
				0.847
				0.593
				0.894
				0.662
				0.724
