# Supplementary material for: Interaction of sortilin with apolipoprotein E3 enables neurons to use long-chain fatty acids as alternative metabolic fuel
Source: Springer Nature journal article supplement (doi:10.1038/s42255-025-01389-5), 2025-10-16
Supplement: MOESM14 [file 42255_2025_1389_MOESM14_ESM.xlsx]

## Sheet: Ext Fig2
Ext Fig. 2
E3WT						E3KO						E4WT						E4KO
	Control	Etomoxir	UK5099				Control	Etomoxir	UK5099				Control	Etomoxir	UK5099				Control	Etomoxir	UK5099
	100	63	57				100	105	63				100	109	60				100	118	57
	100	73	49				100	133	76				100	80	56				100	108	71
	100	71	44				100	102	75				100	107	74				100	101	63
