# Supplementary material for: Interaction of sortilin with apolipoprotein E3 enables neurons to use long-chain fatty acids as alternative metabolic fuel
Source: Springer Nature journal article supplement (doi:10.1038/s42255-025-01389-5), 2025-10-16
Supplement: MOESM15 [file 42255_2025_1389_MOESM15_ESM.xlsx]

## Sheet: Ext Fig3
Ext Fig. 3 a-b
E3WT
	Citrate			Malate			Fumarate			Succinate
	Control	Palmitate		Control	Palmitate		Control	Palmitate		Control	Palmitate
	41775	62049		83552	173321		12708*	18789		5696	11310
	16866	31970		46759	59233		6803	14813		7175	7892
	17034	32027		65805	111846		7194	11773		3510	4658
	99081*	137387*		119429	367906		5526	9145		2016	8708
	30645	57512		39423	176005		5030	10314		6303	7917
	11786	21664		79896	114323		7343	9787		12908	37208*
E3KO
	Citrate			Malate			Fumarate			Succinate
	Control	Palmitate		Control	Palmitate		Control	Palmitate		Control	Palmitate
	15100	14820		43334	25605		2972	3226		4118	5760
	76627	80930		262021	125399		23407	21910		13745	14846
	29038	52160		239973	159440		15735	15638		14316	12692
	21292	23189		418220	381029		17813	4951		12550	8983
	73565	38602		540837	434662		12307	4753		8969	10596
	33064	23277		615945	462888		9911	6579		22300	13694
