# Supplementary material for: Interaction of sortilin with apolipoprotein E3 enables neurons to use long-chain fatty acids as alternative metabolic fuel
Source: Springer Nature journal article supplement (doi:10.1038/s42255-025-01389-5), 2025-10-16
Supplement: MOESM16 [file 42255_2025_1389_MOESM16_ESM.xlsx]

## Sheet: Ext Fig4
Ext Fig. 4
	Cd36											Slc27a1											Slc27a6											Cpt1a											Cpt1c
	E3WT	E3KO	E4WT	E4KO								E3WT	E3KO	E4WT	E4KO								E3WT	E3KO	E4WT	E4KO								E3WT	E3KO	E4WT	E4KO								E3WT	E3KO	E4WT	E4KO
	1.734	1.745	1.282	0.464								1.019	1.245	1.013	0.721								1.116	1.113	0.97	0.91								1.90192	1.09637	0.681783	0.426087								1.29725	0.766942	0.889198	0.378114
	0.668	1.525	2.822	2.383								0.913	1.172	0.961	0.836								0.828	1.121	1.224	1.025								0.654499	1.70486	0.539557	1.12905								0.49552	1.15588	0.556893	0.935426
	1.434	2.238	0.725	2.817								1.082	1.102	0.992	1.048								1.001	1.172	1.064	1.287								1.02809	1.51042	1.20962	1.21066								0.662515	0.599188	0.663116	1.77511
	0.582	2.126	2.021	0.468								1.246	1.085	1.007	0.763								1.28	1.312	0.875	0.589								2.14478	1.44567	0.765743	1.29848								1.49478	1.39157	0.659365	1.39951
	0.742	0.53	0.782	2.506								0.881	1.073	0.985	0.932								0.791	1.084	0.971	1.206								0.719765	1.67839	1.34863	1.89779								1.3165	0.869182	0.943292	1.4548
	1.123	2.295	0.465	2.58								1.032	0.962	0.814	0.916								1.013	1.305	0.82	1.097								0.703997	1.49735	1.16285	2.82342								1.02518	1.0283	0.860342	1.08423
	1.171	1.734	0.854	0.638								1.066	1.102	0.959	0.852								1.194	0.957	0.874	1.025								1.28015	2.00176	2.35405	0.906649								1.186	0.886949	1.3081	0.500388
	1.643	0.488	0.677	1.53								0.991	0.966	0.876	0.747								1.222	0.873	1.089	0.72								0.561647	0.247224	1.38634	1.01285								0.981377	0.184702	1.31697	0.493286
	1.719	0.374	2.211	2.267								0.975	1.009	0.905	0.962								1.068	0.835	1.304	1.147								1.056	0.901	1.118	0.988
	0.376	0.323	0.52	2.764								0.852	0.821	0.866	0.957								0.675	0.915	0.795	1.039								1.069	0.855	0.926	0.907
																																		1.056	0.947	1.107	1.126
																																		1.058	0.966	1.054	0.911
																																		1.003	1.046	0.959	0.912
																																		1.218	0.981	1.018	0.92
																																		0.883	0.971	1.097	0.905
																																		0.899	1.118	1.003	0.836
																																		0.85	0.981	1.075	0.94
																																		0.962	1.009	0.928	1.16
