# Supplementary material for: Interaction of sortilin with apolipoprotein E3 enables neurons to use long-chain fatty acids as alternative metabolic fuel
Source: Springer Nature journal article supplement (doi:10.1038/s42255-025-01389-5), 2025-10-16
Supplement: MOESM17 [file 42255_2025_1389_MOESM17_ESM.xlsx]

## Sheet: Ext Fig5c
Ext Fig. 5c
	GFAP										APOE										S100B										ADH1L1
	E3WT	E3KO	E4WT	E3KO							E3WT	E3KO	E4WT	E3KO							E3WT	E3KO	E4WT	E3KO							E3WT	E3KO	E4WT	E3KO
	1.668	0.649	0.448	0.885							1.234	1.022	1.063	1.212							1.089	1.301	0.845	0.904							1.353	1.987	1.205	3.006
	1.327	0.557	0.306	0.883							0.793	0.782	1.102	1.58							0.834	1.36	0.746	0.805							1.116	1.725	1.181	2.685
	0.452	0.394	0.358	0.536							1.022	1.855	1.866	1.468							1.1	2.052	0.56	0.47							0.662	4.969	2.496	3.245
		0.279	0.314	0.506								1.614	1.942	1.406								1.781	0.606	0.518								4.917	2.244	4.533
		1.337	0.93	2.664								1.06	2.439	1.387								1.686	0.968	1.412								1.398	1.501	5.122
			0.815	2.884									1.741	1.807									1.076	1.727									1.797	5.776

## Sheet: Ext Fig5i
Ext Fig. 5i
	TUBB3									MAP2									NEFL									RBFOX3
	E3WT	E3KO	E4WT	E3KO						E3WT	E3KO	E4WT	E3KO						E3WT	E3KO	E4WT	E3KO						E3WT	E3KO	E4WT	E3KO
	0.82	0.721	1.639	1.189						1.136	0.4	1.289	1.381						0.711	0.53	1.153	1.803						0.978	0.863	1.142	1.216
	0.609	0.5	1.196	1.593						0.671	0.281	0.838	1.49						0.552	0.412	0.648	1.364						0.711	0.564	1.035	1.352
	0.762	0.817	1.597	1.872						0.766	0.63	1.622	2.074						0.7	0.876	1.7	1.869						0.782	1.244	1.294	1.45
	1.681	3.545	2.01	2.978						1.322	1.513	1.404	2.195						2.053	2.363	1.198	2.479						1.453	2.146	1.468	1.566
	1.565	2.487	1.579	3.083						1.296	1.425	1.288	2.005						1.772	2.198	1.359	2.703						1.265	1.638	1.813	1.792
