# Supplementary material for: Interaction of sortilin with apolipoprotein E3 enables neurons to use long-chain fatty acids as alternative metabolic fuel
Source: Springer Nature journal article supplement (doi:10.1038/s42255-025-01389-5), 2025-10-16
Supplement: MOESM19 [file 42255_2025_1389_MOESM19_ESM.xlsx]

## Sheet: Ext Fig6a
Ext Fig. 6a
		Delta Rn		Delta Rn
		Allele 1 (APOEε4)		Allele 2 (APOEε3)
	E3*WT	0.562423		2.68382
	E3*WT	0.472624		3.12645
	E3*WT	0.541535		2.8637
	E3*KO	0.535889		2.56702
	E3*KO	0.503018		2.81292
	E3*KO	0.484319		2.95709
	APOEε3/ε3	0.544308		2.59039
	APOEε3/ε3	0.518597		2.7342
	APOEε3/ε3	0.505995		2.87326
	APOEε3/ε4	1.15851		1.95167
	APOEε3/ε4	1.10869		2.03364
	APOEε3/ε4	1.14743		2.03862
	APOEε4/ε4	1.60828		0.722
	APOEε4/ε4	1.56103		0.758
	APOEε4/ε4	1.55422		0.769
	water	0.061471		0.163754
	water	0.0632186		0.174455
	water	0.0661348		0.180685

## Sheet: Ext Fig6f
Ext Fig. 6f
	OCT4			SOX2
	E3*WT	E3*KO		E3*WT	E3*KO
	1.00383	1.13797		1.05646	1.20113
	1.18767	0.917237		1.01126	0.984837
	1.24269	0.813765		1.37358	1.53922
	0.830847	0.977769		1.07634	1.57119
	0.900479	0.752323		0.72328	1.07811
	0.90217	0.937343		0.875329	1.38469

## Sheet: Ext Fig6h
Ext Fig. 6h
	MAP2			RBFOX3			NEFL
	E3*WT	E3*KO		E3*WT	E3*KO		E3*WT	E3*KO
	0.72697	1.13577		0.842169	1.04918		0.66392	1.16614
	1.00777	0.940927		0.938352	1.03893		1.00293	0.967612
	1.07896	0.971958		1.10653	1.12194		1.07419	1.02287
	1.00134	0.762223		0.988895	0.951721		1.06042	0.801761
	1.1375	0.840583		0.993058	0.920585		1.09388	0.84666
	1.11065	1.28404		1.16452	1.38926		1.20527	1.2671

## Sheet: Ext Fig6i-j
Ext Fig. 6i-j
E3*WT									E3*KO
	Control	Etomoxir	UK5099							Control	Etomoxir	UK5099
	100	88	52							100	104	46
	100	80	61							100	99	70
	100	80	45							100	99	42
