# Supplementary material for: Interaction of sortilin with apolipoprotein E3 enables neurons to use long-chain fatty acids as alternative metabolic fuel
Source: Springer Nature journal article supplement (doi:10.1038/s42255-025-01389-5), 2025-10-16
Supplement: MOESM21 [file 42255_2025_1389_MOESM21_ESM.xlsx]

## Sheet: Ext Fig7b
Ext Fig.7b
	E3WT	E3KO	E4WT	E4KO
	32.0261	39.4348	48.9007	44.166
	26.2917	29.0597	44.1782	41.7357
	51.3156	30.915	44.3811	41.3294
	30.0847	35.6529	32.6406	23.5952
	29.4637	33.992	38.5766	19.3331
	36.4045	40.0865	36.5982	19.7678
	30.8442	34.7149	29.2598	34.7988
	27.447	34.0716	22.9724	40.108
	29.3789	25.2038	24.9492	36.3663
	18.8017	40.2946	29.5927	50.6029
	54.4566	21.9967	26.9191	29.0581
	38.9287	36.8697	33.4988	40.53
	31.5993	22.5844	23.4197	35.1809
	37.7261	42.7192	40.8897	45.5788
	33.594	54.9923	35.4766	32.873
	46.0432	38.6574	39.1943	45.4978
	46.5005	50.4607	35.2651	37.4786
	35.7539	65.9237	45.0401	38.6757
	26.182	39.6251	50.2861	48.0144
	39.6669	43.0048	26.1727	36.1276
	47.3104	52.9235	42.8909	42.363
	32.9548	41.3138	58.5684	50.3308
	36.7417	60.1556	32.4986	34.3548
	31.4609	49.5819	52.3509	41.6767
	39.6391	57.6807	32.1332	40.2304
	55.2661	39.3322	36.6571	47.0348
	46.5364	54.5738	27.1897	54.4874
	43.448	30.7702	40.5364	69.4537
	67.1679	42.8293	46.045	58.234
	49.3527	60.4008	32.7999	33.3781
	48.3504	45.6837		46.385
		35.9065		52.8803
		43.0042
		42.5592
		46.3072
		40.2205
		39.9779

## Sheet: Ext Fig7e
Ext Fig.7e
Area
	E3WT	E3KO	E4WT	E4KO
	520602	67237	97377.1	114267
	177721	52929.5	109398	44343.4
	449375	47854.8	47044.2	76342.6
	585599	376901	19311	135894
	112217	105960	37575.7	55792.8
	112541	457100	214805	37462.8
	96769.7	37038.2	85404.6	79442.9
	40167.2	72628.9	54220.6	51385.1
	50446.3	130986	235028	39692.3
	50811.1	50089.8	416650	73613.6
	69458.2	63071.5	44548.5	58281.1
	40220.9	184020	64805.7	71240.1
	68979.5	586016	36524.4	107085
	364878	429055	94980.4	42521.3
	186651	33188.4	59210.6	54658.6
	189402	185204	28572.5	86888.7
	161722	120453	27389.7	69690.1
	32749.1	50204.2	49222.8	84316.2
	49800	52239.7	37834	47904.8
	129688	222983	74650.5	270605
	31413.5	75895.4	143623	239937
	17970.8	117892	55178	77420.7
	71979.4	196291	53081.3	196196
	120020	71485.9	30409	96361.8
	90344.1	99198.2	186084	24310.2
	309745	61414.2	44735.5	97274.3
	67834.2	197305	25273.2	68205.5
	219275	60499.4	56048.8	49626.9
	412428	44648.9	75132.9	79790.1
	64963.1	70023	29158.1	79563.2
	247765	218378	26785.1	61304
	89945.1	22992.2	45039.2	66239.4
	82030.7	94305	25162	133970
	140744	53080.9	148978	31755.7
	291987	61767	77303.2	217068
	106748	166765	36120.7	41301.4
	415122	38447	55027.1	81092.3
	46675.2		41506.1	48074.7
	50472.2		34596.7	162073
			221799	236615
			32759.3	383051
			76119.4	221164
			27982.3	100926
			233565	54787.7
			113210	145176
			52952.6	145151
			38407.2	97290
			51067.1	40016.3
			76117.1	253150
			77150.9	72019.2
			112999	191762
			61321.2	70186.9
			33962	60188.4
			38196.5	57330.2
			195021	49637.1
			83700.5
			119525
			38946.5
			228650
			71191.9
			41442.2
			28813.2
			26403.6
			86366.1
			228168
			69290.6
			57849.1
			213375
			57830.6
			34053.2
			77419.8
			68454.1
			62408.6
			59859.7
			126088
			127861
			342335
			512490
Circularity
	E3WT	E3KO	E4WT	E4KO
	0.679	0.907	0.879	0.897
	0.821	0.763	0.897	0.852
	0.757	0.895	0.785	0.713
	0.335	0.91	0.796	0.877
	0.918	0.825	0.892	0.586
	0.847	0.543	0.74	0.857
	0.85	0.901	0.884	0.591
	0.894	0.916	0.8	0.843
	0.831	0.829	0.739	0.9
	0.824	0.728	0.41	0.836
	0.853	0.742	0.924	0.803
	0.803	0.719	0.894	0.725
	0.424	0.442	0.917	0.725
	0.577	0.76	0.912	0.79
	0.542	0.89	0.876	0.84
	0.354	0.657	0.936	0.528
	0.257	0.791	0.825	0.65
	0.892	0.869	0.714	0.651
	0.861	0.885	0.849	0.708
	0.636	0.73	0.535	0.435
	0.843	0.677	0.298	0.492
	0.832	0.691	0.738	0.895
	0.879	0.727	0.826	0.521
	0.861	0.847	0.884	0.683
	0.886	0.763	0.332	0.934
	0.496	0.802	0.922	0.731
	0.882	0.907	0.905	0.748
	0.688	0.883	0.859	0.905
	0.804	0.724	0.643	0.87
	0.809	0.858	0.902	0.658
	0.425	0.783	0.922	0.651
	0.835	0.866	0.799	0.573
	0.758	0.662	0.943	0.433
	0.78	0.599	0.356	0.919
	0.224	0.65	0.564	0.426
	0.515	0.808	0.898	0.949
	0.238	0.791	0.794	0.611
	0.782		0.497	0.864
	0.638		0.953	0.721
			0.322	0.409
			0.927	0.852
			0.583	0.54
			0.896	0.732
			0.33	0.842
			0.574	0.63
			0.743	0.563
			0.863	0.907
			0.905	0.909
			0.889	0.635
			0.804	0.92
			0.56	0.879
			0.71	0.881
			0.849	0.907
			0.921	0.886
			0.314	0.774
			0.529
			0.436
			0.875
			0.22
			0.808
			0.892
			0.949
			0.869
			0.596
			0.299
			0.831
			0.927
			0.573
			0.914
			0.881
			0.818
			0.831
			0.893
			0.927
			0.863
			0.863
			0.742
			0.222
