# Supplementary material for: Interaction of sortilin with apolipoprotein E3 enables neurons to use long-chain fatty acids as alternative metabolic fuel
Source: Springer Nature journal article supplement (doi:10.1038/s42255-025-01389-5), 2025-10-16
Supplement: MOESM23 [file 42255_2025_1389_MOESM23_ESM.xlsx]

## Sheet: Ext Fig9a
Ext Fig. 9a
	ω-3 PUFA					DHA					ω-6 PUFA					C22:5n-3					C14:0					C16:1n-7					C20:1n-9					ARA					Synaptamide					2-AG
	E4WT	E4KO				E4WT	E4KO				E4WT	E4KO				E4WT	E4KO				E4WT	E4KO				E4WT	E4KO				E4WT	E4KO				E4WT	E4KO				E4WT	E4KO				E4WT	E4KO
	7.47	4.04				1.2	0.58				8.78	6.03				0.75	0.57				1.97	1.2				2.57	1.39				3.33	1.97				5.23	2.58				341.01	130.11				24797.5	26045
	5.48	5.78				0.84	0.82				6.62	8.21				0.52	0.66				1.47	1.66				2	2.17				2.54	2.54				3.78	3.97				265.44	176.45				15693.6	25947
	5.02	4.68				0.79	0.59				5.82	5.96				0.5	0.55				1.27	1.33				1.86	1.68				2.34	2.08				3.46	3.19				269.81	135.68				18180.1	15146.5
	6.14	4.79				0.92	0.77				7.79	13.79				0.53	0.78				1.41	1.63				2.18	2.02				2.92	2.59				4.43	2.3				282.35	153.42				25301.4	23595.5
	5.06	5.46				0.84	0.77				5.89	7.1				0.48	0.67				1.15	1.45				1.96	2				2.44	2.62				3.59	3.85				280.28	192.29				31744.2	22585
	5.96	5.21				1.02	0.68				7.6	6.6				0.57	0.63				1.43	1.27				2.15	1.77				2.87	2.48				4.1	3.74				287.3	164.42				31602	13251.2
	6.55	7.8				1.17	1.4				7.39	9.41				0.6	0.78				1.35	1.97				1.99	2.26				2.03	2.98				4.5	5.28				204.31	175.74				21143.2	33483.1
	4.27	7.2				0.8	1.34				5.98	10.69				0.42	0.81				1.23	1.96				1.34	2.13				1.7	2.63				2.84	4.87				282.24	173.31				34136.4	25338.3
	4.54	8.62				0.77	1.34				5.87	10.24				0.41	0.92				1.08	2.18				1.39	2.26				1.86	3.01				3.17	6.21				281.58	197.42				21105.6	26388
	4.24	7.06				0.74	1.18				5.85	8.93				0.41	0.73				1.12	1.69				1.35	2.14				1.63	2.84				2.79	4.77				249.37	192.79				17151.5	18402.8
	4.5	6.59				0.92	1.03				5.46	9.2				0.35	0.67				0.97	1.43				1.4	1.8				1.7	2.46				3.12	4.56				249.01	164.35				23463.5	27607.6
	6.55	5.59				1.29	0.81				8.47	7.1				0.52	0.62				1.52	1.28				1.93	1.79				2.66	2.39				4.25	3.78				312.14	203.93				46437.5	24284.1
	4.48	6.04				0.72	0.84				5.94	6.88				0.42	0.67				0.82	1.38				1.02	1.93				1.33	2.53				3.13	4.19				194.27	219.28				23270.3	21536.5
		5.23				1.05	0.77				6.16	6.16				0.39	0.57				1.83	1.3					1.76				2.85	2.34				3.64	3.53				314.75	207.75				31397.3	19054.2
		7.82				0.84	1.14				5.51	8.7				0.34	1.05				1.56	1.32					1.8				2.41	2.48				3.2	5.35				355.79	207.92				35326.8	33656.4
						0.94					5.35					0.37					1.58										2.64					3.26					334.09					36074.1
						0.76					5.42					0.35					1.56										2.49					3.02					278.82					46434
						0.71					4.88					0.34					1.39										2.21					3.03					291.78					41154
						0.69					5.41					0.36					1.48										2.37					2.93					335.05					43505.6
						0.49					3.82					0.3					1.37										2.04					2.39					234.86					14606.9
						0.63					4.5					0.32					1.62										2.38					2.84					284.06					41659.8
						0.56					3.94					0.28					1.5										2.15					2.46					233.32					32994.9
						0.58					4.06					0.28					1.56										2.23					2.53					277.44					49683.7

## Sheet: Ext Fig9b
Ext Fig. 9b
	ω-3 PUFA					DHA					ω-6 PUFA					C22:5n-3					C16:1n-7					C20:1n-9					ARA					Synaptamide					Anandamide					LEA
	E4WT	E4KO				E4WT	E4KO				E4WT	E4KO				E4WT	E4KO				E4WT	E4KO				E3WT	E3KO				E4WT	E4KO				E4WT	E4KO				E4WT	E4KO				E4WT	E4KO
	234.59	636.63				66.49	241.94				721.78	1321.04				32.57	89.35				175.99	127.48				20.98	164.27				90.02	68.57				0.1	0.02				0.04	0.02				0.05	0.05
	291.78	245.06				44.71	37.46				1171.44	803.95				24.45	29.35				142.35	142.49				40	26.33				32.19	33.24				0.04	0.03				0.03	0.03				0.05	0.06
	259.84	165.33				29.54	16.35				1089.74					22.83	16.16				119.57	52.45				27.05	23.32				19.04	14.89				0.04	0.01				0.03	0.02				0.05	0.08
	170.77	196.65				18.37	13.09				276.28					17.22	16.18				76.24	62.21				21.11	22.62				1.67	9.7				0.03	0.02				0.02	0.02				0.06	0.06
	278.32	355.2				100.17	71.5				340.53					44.06	24.51				69.02	69.91				79.11	34.54				8.1					0.02	0.02				0.02	0.02				0.08	0.07
	221.59	233.51				54.69	38.4				609.08					24.34	17.42				94.34	64.04				15.56	10.54				22.69					0.03	0.02				0.02	0.02				0.05	0.06
	174.21					34.81					822.85					17.52					76.64					8.48					12.37					0.03					0.02					0.07
	44.3					16.36					545.73					6.27					28.25					8.87					20.16					0.023					0.029					0.323
	46.99					11.67					1249.07					2.65					19.41					9.14					22.8					0.035					0.065					0.31
	234.81					92.59					775.48					35.77					151.29					16.43					102.67					0.023					0.021					0.305
	210.03					40.29										30.47					79.85					13.71					126.84					0.014					0.007					0.434
	182.2					74.08										28.5					95.99					19.83					112.59					0.019					0.059					0.502
	298.83					109.59										25.48					114.59					32.71					63.95															0.605
	192.09					55.87										24.41					102.71					14.37					49.16															0.26
