# Supplementary material for: Interaction of sortilin with apolipoprotein E3 enables neurons to use long-chain fatty acids as alternative metabolic fuel
Source: Springer Nature journal article supplement (doi:10.1038/s42255-025-01389-5), 2025-10-16
Supplement: MOESM24 [file 42255_2025_1389_MOESM24_ESM.xlsx]

## Sheet: Ext Fig10a
Ext Fig.10a
Well	Gene Symbol	Fold Change
		Group 1/Control Group	log2 fold change
C06	ELN	0.2	-2.32193
A11	ANGPTL4	0.29	-1.78588
C01	CYP4A11	0.4	-1.32193
E03	MMP9	0.48	-1.05889
B12	CYP27A1	0.53	-0.915936
D12	LPL	0.57	-0.810966
B07	CPT1A	0.58	-0.785875
B03	APOE	0.59	-0.761213
D10	KLF10	0.64	-0.643856
C03	DGAT1	0.66	-0.599462
E06	NR1H3	0.7	-0.514573
C05	EHHADH	0.72	-0.473931
B06	CLU	0.73	-0.454032
F10	RXRG	0.74	-0.434403
F06	HELZ2	0.75	-0.415037
F08	RXRA	0.79	-0.340075
A01	ACAA2	0.83	-0.268817
B04	CD36	0.82	-0.286304
G11	TXNIP	0.82	-0.286304
F07	PTEN	0.87	-0.200913
E09	PCK2	0.88	-0.184425
C04	ECH1	0.91	-0.136062
F03	PPARGC1A	0.91	-0.136062
F09	RXRB	0.92	-0.120294
B09	CPT2	0.93	-0.104697
E10	PDPK1	0.94	-0.0892673
E11	PLTP	0.94	-0.0892673
A07	ACSL3	0.95	-0.0740006
D02	FABP6	0.96	-0.0588937
G07	SMARCD3	0.96	-0.0588937
F02	PPARG	0.97	-0.0439433
F12	SIRT1	0.97	-0.0439433
A03	ACADM	0.98	-0.0291463
D11	LPIN1	0.98	-0.0291463
G04	SLC27A4	0.98	-0.0291463
G10	TGS1	0.98	-0.0291463
A08	ACSL4	0.99	-0.0144996
B05	CHD9	0.99	-0.0144996
F01	PPARD	1	0
G02	SLC27A1	1	0
D09	ILK	1.01	0.0143553
F05	PPRC1	1.01	0.0143553
E02	MLYCD	1.03	0.0426443
D04	FADS2	1.04	0.0565835
G08	SORBS1	1.04	0.0565835
B11	CREBBP	1.06	0.0840643
F04	PPARGC1B	1.06	0.0840643
C11	FABP3	1.07	0.0976108
D07	HIF1A	1.07	0.0976108
C08	ETFDH	1.08	0.111031
G09	SRC	1.08	0.111031
A04	ACOX1	1.1	0.137504
F11	SCD	1.1	0.137504
C07	EP300	1.13	0.176323
E05	NCOA6	1.13	0.176323
A06	ACSL1	1.17	0.226509
E01	MED1	1.18	0.238787
A05	ACOX3	1.23	0.298658
B10	CREB1	1.23	0.298658
D06	GK	1.26	0.333424
G05	SLC27A5	1.29	0.367371
G01	SLC22A5	1.33	0.411426
E04	NCOA3	1.34	0.422233
A02	ACADL	1.35	0.432959
B08	CPT1B	1.37	0.454176
D01	FABP5	1.4	0.485427
G03	SLC27A2	1.41	0.495695
B02	APOC3	1.42	0.505891
E12	PPARA	1.69	0.757023
A12	APOA1	1.71	0.773996
A09	ACSL5	2.13	1.09085
G06	SLC27A6	2.41	1.26903
G12	UCP1	2.76	1.46467
A10	ADIPOQ	1.27	0.344828	Genes excluded from analysis: undetected sample run
B01	APOA5	1.27	0.344828
C02	CYP7A1	1.27	0.344828
C09	FABP1	1.27	0.344828
C10	FABP2	1.27	0.344828
C12	FABP4	0.42	-1.25154
D03	FABP7	3.24	1.69599
D05	FGR	2.39	1.25701
D08	HMGCS2	0.4	-1.32193
E07	OLR1	1.27	0.344828
E08	PCK1	0.05	-4.32193

## Sheet: Ext Fig10b
Ext Fig. 10b-c
Data Analysis Software Version:			1.0
PCR Array Catalog:			PAHS-149Z
Test Group:			Group 1
Control Group:			Control Group
Fold Difference:			2
Arrays included in Test Group:			iNs E4KO (1)
Arrays included in Control Group:			iNs E4WT (1)
Genes Over-Expressed in							Genes Under-Expressed in
Group 1 vs. Control Group							Group 1 vs. Control Group
Position	Gene Symbol	Fold Regulation	Comment	Assay Catalog #			Position	Gene Symbol	Fold Regulation	Comment	RT2Catalog
A09	ACSL5	2.13		PPH06335A			A11	ANGPTL4	-3.47	A	PPH02234F
D03	FABP7	3.24		PPH02438B			C01	CYP4A11	-2.51		PPH01232F
D05	FGR	2.39		PPH00093F			C06	ELN	-5.10	A	PPH06895F
G06	SLC27A6	2.41		PPH09394A			C12	FABP4	-2.36		PPH02382F
G12	UCP1	2.76		PPH02223A			D08	HMGCS2	-2.48		PPH09642A
							E03	MMP9	-2.10	A	PPH00152E
Genes excluded from analysis: undetected sample run							E08	PCK1	-19.50		PPH02304F

## Sheet: Ext Fig10d
Ext Fig. 10d
	PPARA							PPARD							PPARG
	E4WT	E4KO						E4WT	E4KO						E4WT	E4KO
	1.022	1.075						0.955	1.263						0.883	1.67
	1.207	1.514						0.914	1.026						0.971	0.76
	1.172	1.328						1.007	1.304						0.987	0.917
	1.076	1.096						1.031	1.057						1.054	0.586
	0.834	1.19						1.108	0.964						1.034	0.822
	0.771	1.163						0.997	1.17						1.085	0.916
